# Supplementary material for: A smartphone-based immunochromatographic strip platform for on-site quantitative detection of antigenic targets
Source: Royal Society of Chemistry journal article supplement (doi:10.1039/d4lc00484a), 2024-01-01
Supplement: d4lc00484a1.pdf [file d4lc00484a1.pdf]

## SUPPLEMENTARY INFORMATION

### **A smartphone-based immunochromatographic strip platform for on-site quantitative detection of antigenic targets**

Enhui Zhang<sup>a#</sup>, Qing Zeng<sup>a#</sup>, Yanwen Xu<sup>b#</sup> Jinhui Lu<sup>a</sup>, Chengcheng Li<sup>a</sup>, Ke Xiao<sup>c</sup>,  
Xiaozhou Li<sup>a</sup>, Jinfeng Li<sup>d</sup>, Tingting Li<sup>a,d\*</sup>, Chengyao Li<sup>a\*</sup>, Ling Zhang<sup>a\*</sup>

<sup>a</sup> Department of Transfusion Medicine, School of Laboratory Medicine and Biotechnology, Southern Medical University, Guangzhou, PR China;

<sup>b</sup> Department of Obstetrics, He Xian Memorial Affiliated Hospital of Southern Medical University, Guangzhou 511402, China;

<sup>c</sup> Department of Laboratory Medicine, The Second Hospital of Chinese Medicine in Guangdong, Guangzhou, 510095, China;

<sup>d</sup> Shenzhen Bao'an District Central Blood Station, Shenzhen, PR China.

# These authors contributed equally to this work.

\*Corresponding author:

Tingting Li, Chengyao Li or Ling Zhang

Department of Transfusion Medicine, School of Laboratory Medicine and Biotechnology, Southern Medical University, Guangzhou 510515, China.

Email: zhangling1982@163.com (L.Z.); chengyaoli@hotmail.com (C.L.); or apple-ting-007@163.com (T.L.)

**Figure S1.** Identification of the monoclonal antibodies to ampicillin.

**Figure S2.** Schematic view of the modified CNPs-strip.

**Figure S3.** Structural composition of SPICS-device.

**Figure S4.** Detailed operating instructions for the photometer APP.

**Figure S5.** Performance of the SPICS-reader.

**Figure S6.** Optimization of the amount of the CNPs conjugates.

**Figure S7.** Optimization of NC membrane coating concentration.

**Figure S8.** Optimization of strips detection time.

**Figure S9.** CNPs-strips were analyzed using conventional commercial image analysis instruments.

**Figure S10.** Examination for light transmission of NC films with different thickness.

**Table S1.** Cost of each component of SPICS-reader and strip.

**Table S2.** Detection of AMP in milk samples using SPICS-reader.

**Table S3.** Detection of HCG in human serum samples using SPICS-reader.

**Table S4.** Detection of PSA in human serum samples using SPICS-reader.

**Table S5.** Comparison of the performance between different biosensors for detection of the antigenic targets.

**Table S6.** Comparison of the performance between different grayscale scanning methods and smartphone immunochromatography methods

## 1. Materials and methods

### 1.1 Preparation of BSA-AMP conjugates

N-Succinimidyl-S-acetylthioacetate (SATA) was first dissolved to a concentration of 15 mg/mL using dimethyl sulfoxide (DMSO), followed by BSA diluted to 1% (w/v) using a mixture of PBS (50 mM, pH 7.6) and EDTA-2Na (10 mM, pH 7.6). 1 mL of dissolved and mixed 15 mg/mL SATA solution was added into a 15 mL centrifuge tube containing 10 mL dissolved and mixed 1% (w/v) BSA solution. The reaction was shook for 30 min at room temperature and away from light. 830  $\mu$ L hydroxylamine hydrochloride solution dissolved with PBS (50 mM, pH 7.6) and EDTA-2Na (10 mM, pH 7.6) was added to the reaction solution after reaction, and the reaction was carried out for 2 h by shaking at room temperature and away from light. The reacted liquid is dialyzed with a mixed solution of 10 mM PBS and 2 mM EDTA-2Na (pH 7.6) for 12 h, and the dialysate is replaced every 2 h.

### 1.2 Preparation of CNPs conjugates and CNPs-strips for SPICS testing.

In the competition method for testing of AMP. Briefly, the prepared carbon nanoparticles (CNPs) are washed 2 times with 0.01 M BB buffer and then resuspended in 0.01 M BB buffer. Subsequently, 10  $\mu$ g of AMP antibody was added to 1 mL of 1  $\mu$ g mL<sup>-1</sup> CNPs, respectively. The mixture was placed in a mixer for a 3-hour reaction at 40 rpm, followed by the addition of 150  $\mu$ L of 10% BSA to block unreacted antibody binding sites. This was further incubated in the mixer at 40 rpm for 2 hours. After centrifugation at 10,000 rpm at 4°C for 10 minutes, the supernatant was removed, and the pellet was suspended in 0.5 mL of dilution buffer (0.01 M, pH 7.6 Tris-HCl; containing 1% (w/v) BSA, 0.05% (w/v) Tween 20, 2% (w/v) sucrose, 2% (w/v) trehalose). The suspension was then sprayed onto the coupling pad using a three-dimensional scribing gold sprayer. On NC membranes, 0.6 mg/mL of AMP-BSA and 0.1 mg/mL of goat anti-mouse IgG were coated on the T and C lines, respectively. The sample pad was treated with a solution (ultrapure water; treating the sample pad with 10% Triton X-100 and 5% Tween 20) and left to dry overnight at 56°C. After

completing the immunochromatography, the assembled bands are tested in a transparent enclosure.

In the sandwich method for testing of HCG or PSA. Similarly, 40  $\mu\text{g}$  of HCGmAb1 and 35  $\mu\text{g}$  of PSA mAb1 were added to 1 mL of CNPs, respectively. After labeling, resuspend with dilution buffer (0.01 M, pH 7.6 Tris-HCl; containing 1% (w/v) BSA, 0.05% (w/v) Tween 20, 2% (w/v) sucrose, 2% (w/v) trehalose). The suspension was then sprayed onto the coupling pad using a three-dimensional scribing gold sprayer. 1.5 mg/mL HCGmAb2 or PSAmAb2 were coated on NC membranes to form the T line, and appropriate rabbit anti-chicken IgY polyclonal antibodies form the C lineage and form an independent quality control system with the CNPs-IgY pre-coated with conjugate pads. The sample pad was treated with a solution (0.2 M, pH 7.4 PBS; containing 0.5% (w/v) BSA, 1% S9, and 0.5% Tween 20) to remove non-specific reactivity and ensure buffering capacity on the NC membrane. The assembly was dried at 56°C for 4 hours following the earlier described method. After completing the immunochromatography, the assembled bands are tested in a transparent enclosure.

### 1.3 Quantitative analysis of CNPs-Strips using both SPICS-reader and commercial immunochromatography instruments

In brief, evaluating CNPs-Strips results using an SPICS-reader is a straightforward process. Taking the CNPs-strip testing model as an example, 100  $\mu\text{L}$  PBS samples containing different volumes of CNPs-IgY (0, 0.5, 1, 2, 4, 4, 8, 16, 32  $\mu\text{L}$ ) at concentrations of 2  $\mu\text{g mL}^{-1}$  (0.5 mL reconstituted) were added to the strip filling wells. After the immune response is complete, the CNPs-Strips are placed in the SPICS-reader, and the light intensity value is read using a smartphone app. Simultaneously, the peak area values of the strip are scanned using a commercially available immunochromatographic quantitative analyzer.

For AMP sample testing, standards of different concentrations (0.5 ng/mL, 1 ng/mL, 2 ng/mL, 3 ng/mL, and 4 ng/mL) are added to fresh milk and then detected with CNPs-strips. The results are measured using an SPICS-reader, and the actual concentration of AMP is calculated based on a linear relationship.

For HCG or PSA sample testing, eight clinical HCG and PSA serum samples from the hospital that were determined by chemiluminescence assay. After CNPs-strips testing, the light intensity values are measured with the SPICS-reader, and the sample concentration is calculated based on a linear relationship.

## 2. Results

### 2.1 Light transmittance test of NC film with different thickness

Sartorius CN95 and CN140, Millipore HF90 and HF135, Whatman AE99, and Pall VIV90 were six commonly used NC films with different thicknesses, which were selected to test the light transmittance. The transmitted light intensity through the NC film was measured sequentially by setting the light source to any constant brightness, and the results were shown in Figure S10, indicating that the NC film thickness had no significant effect on the light projection.

### 2.2 Precision and accuracy of SPICS-reader

The feasibility of SPICS-reader system for the analysis of AMP-supplemented milk samples was verified. The results of the analysis are shown in Table S2, The recoveries in all of these samples ranged from 96.1-105%. And validating the feasibility of SPICS-reader system for the analysis of HCG and PSA in clinical serum samples. The results of the analysis are shown in Tables S3 and S4, the recoveries for all of these cases were 97.4-106.9% and 96.2-105.2%, respectively. This showed that the SPICS-reader system had excellent precision and accuracy.

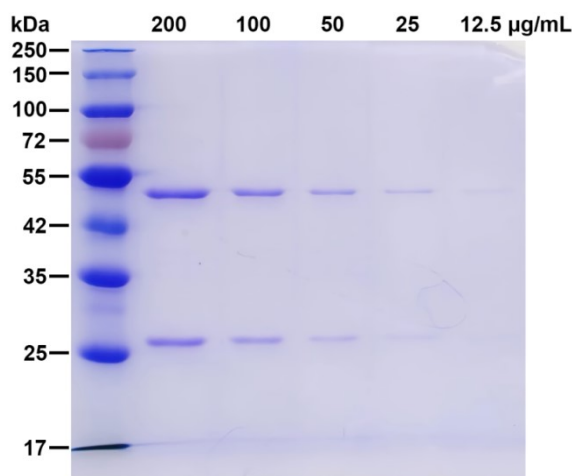

**Figure S1.** Identification of the monoclonal antibodies to ampicillin. Polyacrylamide

gel Coomassie Brilliant Blue staining assay prepared.

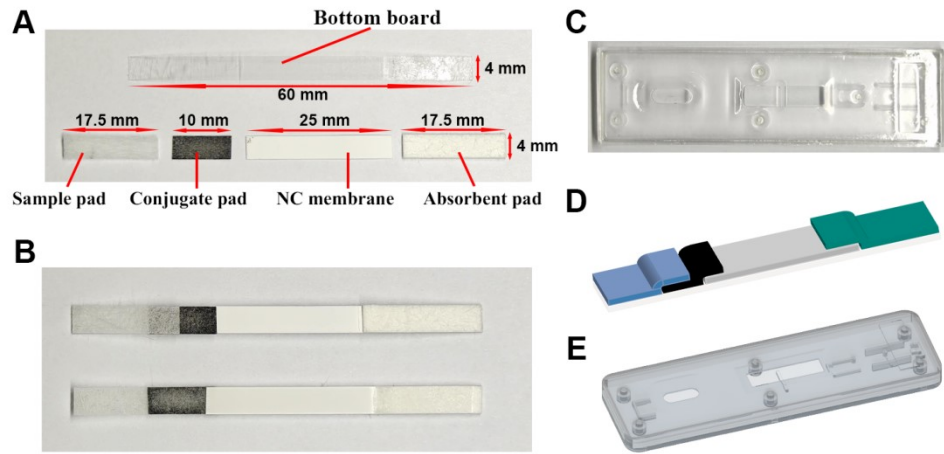

**Figure S2.** Schematic view of the modified CNPs-strip. (A) The composition of the test strip; (B) Test strips after assembly; (C) 3D printed transparent cassette; (D) the components of the modified CNPs-strip, and (E) the modified plastic housing.

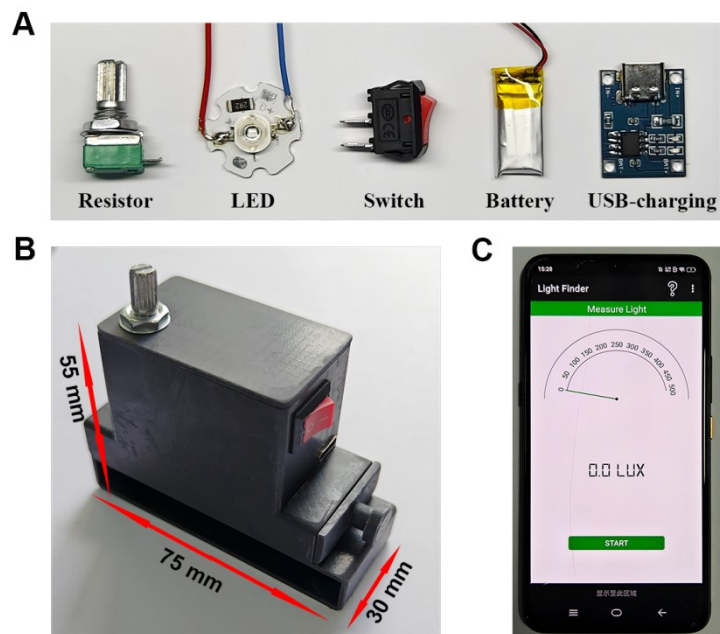

**Figure S3.** Structural composition of SPICS device. (A) Main components of light signal reading device; (B) The SPICS-device appearance drawing; (C) Smartphone data display interface.

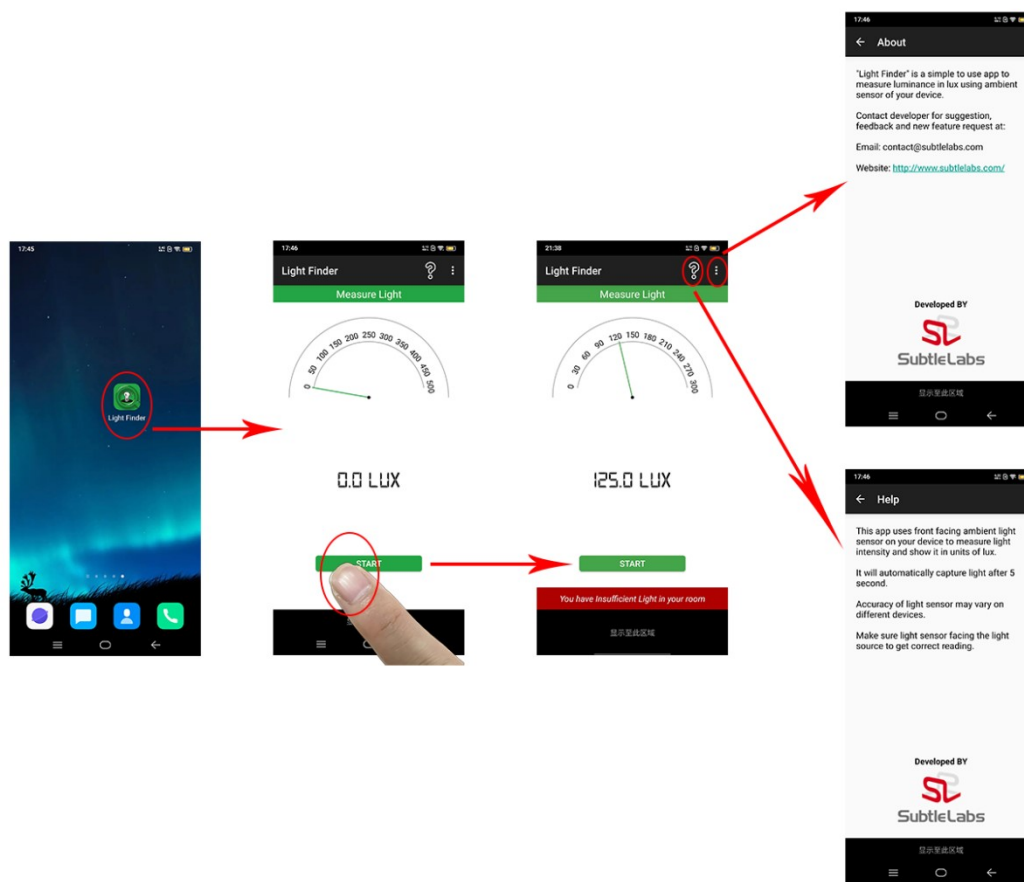

**Figure S4.** Detailed operating instructions for the photometer APP

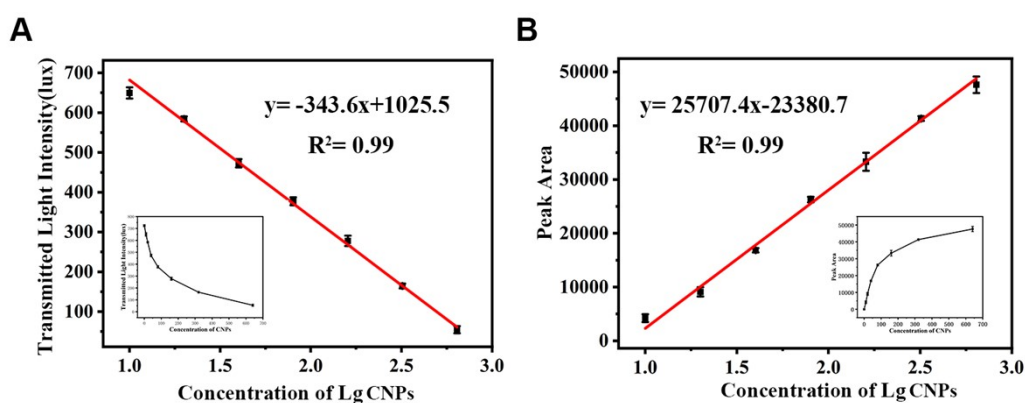

**Figure S5.** Performance of the SPICS-reader. (A) CNPs-strips analysis results obtained by SPICS-reader; (B) CNPs-strips detected by commercial analytical instruments. Each value represents the average of three independent experiments ( $n = 3$ ).

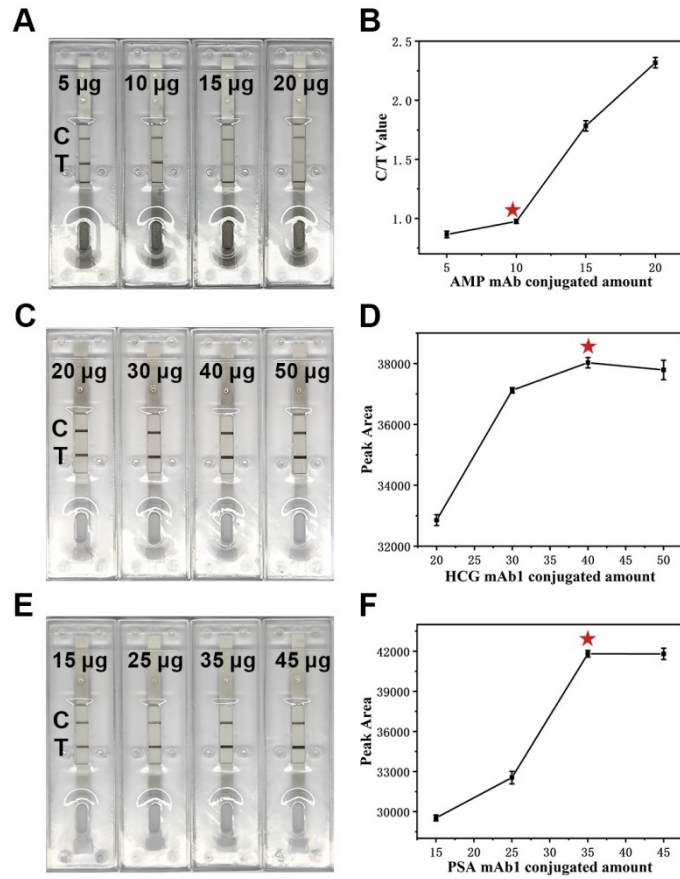

**Figure S6.** Optimization of the amount of the CNPs conjugates. (A/B) The AMP-strips; (C/D) The HCG-strips; (E/F) The PSA-strips. Each value represents the average of three independent experiments ( $n = 3$ ).

CNPs-AMPmAb conjugates; CNPs-HCGmAb1 conjugates; CNPs-PSAmAb1 conjugates



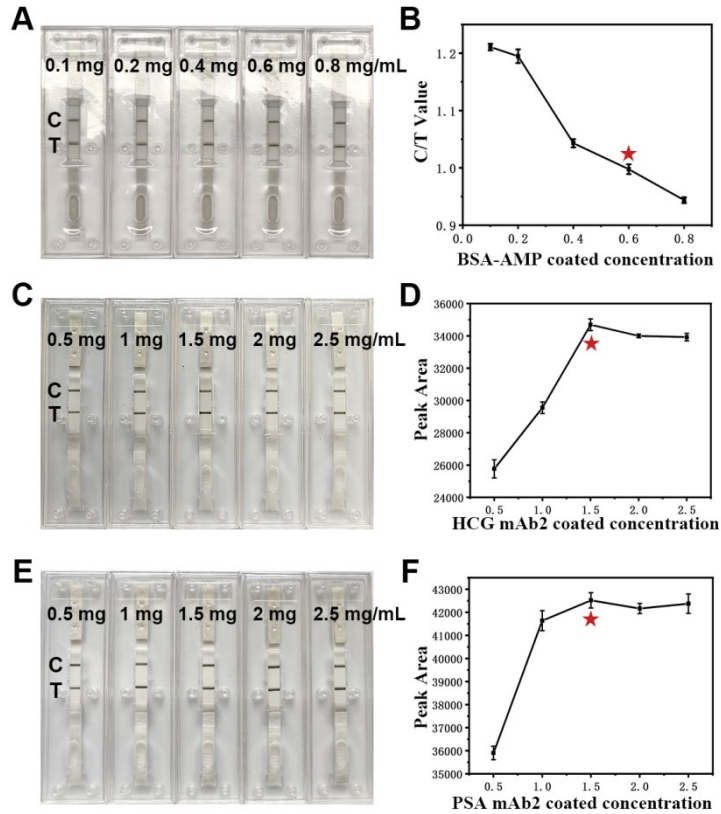

**Figure S7.** Optimization of NC membrane coated concentration. (A/B) The AMP-strips; (C/D) The HCG-strips; (E/F) The PSA-strips. Each value represents the average of three independent experiments ( $n = 3$ ).

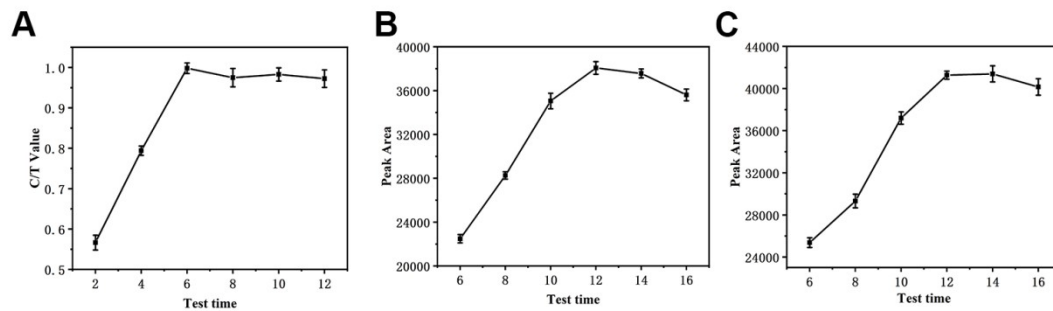

**Figure S8.** Optimization of strips detection time. (A) The AMP-strips; (B) The HCG-strips; (C) The PSA-strips. Each value represents the average of three independent experiments ( $n = 3$ ).

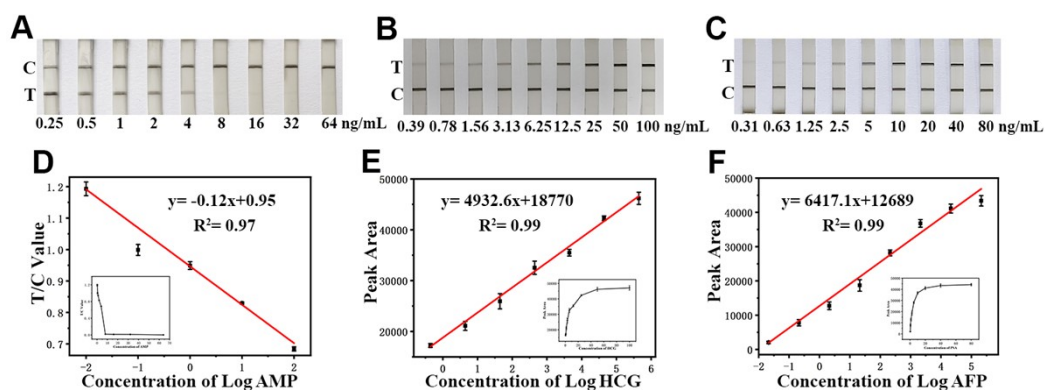

**Figure S9.** CNPs-strips were analyzed using conventional commercial image analysis instruments. (A/D) The AMP-strips; (B/E) The HCG-strips; (C/F) The PSA-strips. Each value represents the average of three independent experiments (n = 3).

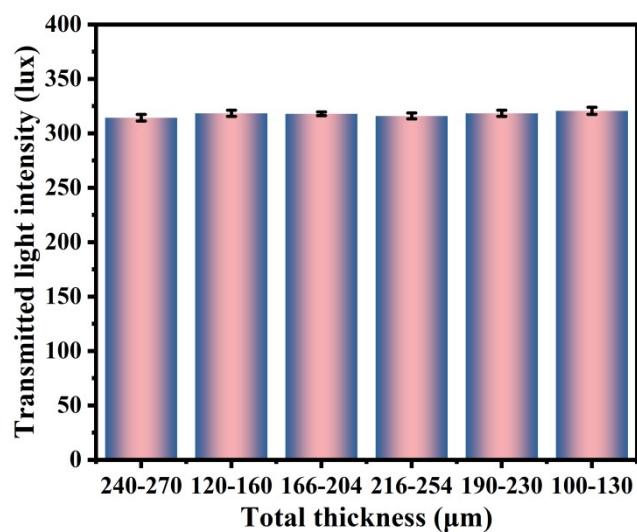

**Figure S10.** Examination for light transmission of NC films with different thickness. Sartorius CN95 (240-270 µm) and CN140 (120-160 µm), Millipore HF90 (166-204 µm) and HF135 (216-254 µm), Whatman AE99 (1000-130 µm), and Pall VIV90 (190-230 µm). Each value represents the average of three independent experiments (n = 3).

**Table S1.** Cost of each component of SPICS-reader and strip.

| Sensor device           |             | CNPs-strip      |              |
|-------------------------|-------------|-----------------|--------------|
| Materials               | Cost (\$)   | Materials       | Cost (\$)    |
| 3D printing consumables | 0.18        | Plastic housing | 0.2          |
| LED                     | 0.33        | NC membrane     | 0.04         |
| Lithium battery         | 0.6         | Antibody        | 0.22         |
| switch                  | 0.14        | Conjugate pad   | 0.005        |
| USB-charging            | 0.12        | Sample pad      | 0.011        |
| Others                  | 0.1         | PET bottom      | 0.015        |
| <b>Total</b>            | <b>1.47</b> | <b>Total</b>    | <b>0.491</b> |

**Table S2.** Detection of AMP in milk samples using SPICS-reader.

| Sample number | Spiked Concentration (ng/mL) | SPICS mean | S.D. | CV (%) | Recovery (%) |
|---------------|------------------------------|------------|------|--------|--------------|
| 1             | 0.5                          | 0.48       | 0.05 | 9.95   | 96.1         |
| 2             | 1                            | 1.05       | 0.11 | 10.19  | 105.0        |
| 3             | 2                            | 2.06       | 0.11 | 5.17   | 102.8        |
| 4             | 3                            | 3.02       | 0.11 | 3.63   | 100.5        |
| 5             | 4                            | 3.98       | 0.14 | 3.63   | 99.5         |

Mean: Average of AMP concentrations in milk samples test by the SPICS (n=3). S.D.: Standard deviation of AMP concentration in milk samples test by the SPICS (n=3). Coefficient of variation (CV) = (S.D. / Mean)×100%. Recovery (%) = (Results of SPICS / Spiked concentration)\*100%.

**Table S3.** Detection of HCG in human serum samples using SPICS-reader.

| Sample number | CLIA (mIU/mL) | SPICS mean | S.D. | CV(%) | Recovery (%) |
|---------------|---------------|------------|------|-------|--------------|
| 1             | 35.5          | 34.59      | 1.12 | 3.23  | 97.4         |
| 2             | 11.3          | 11.95      | 0.82 | 6.85  | 105.7        |
| 3             | 15            | 16.04      | 0.81 | 5.07  | 106.9        |
| 4             | 44.5          | 43.97      | 1.22 | 2.77  | 98.8         |
| 5             | 83.7          | 85.97      | 1.21 | 1.41  | 102.7        |
| 6             | 64            | 65.40      | 2.16 | 3.31  | 102.2        |
| 7             | 1.45          | 1.51       | 0.18 | 12.18 | 104.3        |
| 8             | 3.13          | 3.17       | 0.30 | 9.32  | 101.2        |

Mean: Average of HCG concentrations in serum samples test by the SPICS (n=3). S.D.: Standard deviation of HCG concentration in serum samples test by the SPICS (n=3). Coefficient of variation (CV) = (S.D./Mean)×100%. Recovery (%) = (Results of SPICS / Results of CLIA)\*100%.

**Table S4.** Detection of PSA in human serum samples using SPICS-reader.

| Sample number | CLIA (ng/mL) | SPICS mean | S.D. | CV(%) | Recovery (%) |
|---------------|--------------|------------|------|-------|--------------|
| 1             | 63.44        | 62.21      | 1.62 | 2.60  | 98.1         |
| 2             | 11.46        | 11.66      | 0.76 | 6.49  | 101.8        |
| 3             | 25.7         | 24.84      | 1.19 | 4.79  | 96.7         |
| 4             | 7.74         | 7.45       | 0.77 | 10.31 | 96.2         |
| 5             | 10.6         | 11.15      | 0.88 | 7.92  | 105.2        |
| 6             | 6.76         | 6.93       | 0.63 | 9.11  | 102.4        |
| 7             | 14.63        | 14.40      | 0.85 | 5.90  | 98.4         |
| 8             | 5.07         | 5.21       | 0.58 | 11.14 | 102.8        |

Mean: Average of PSA concentrations in serum samples test by the SPICS (n=3). S.D.: Standard deviation of PSA concentration in serum samples test by the SPICS (n=3). Coefficient of variation (CV) = (S.D./Mean)×100%. Recovery (%) = (Results of SPICS / Results of CLIA)\*100%.

**Table S5.** Comparison of the performance between different biosensors for the detection of the antigenic targets.

| Detection technique                   | Antigenic target | Limit of detection | Linearity       | Total analysis time | References |
|---------------------------------------|------------------|--------------------|-----------------|---------------------|------------|
| SPICS                                 | AMP              | 0.23 ng/mL         | 0.25-4 ng mL    | 7 min               | This work  |
| Smartphone-colorimetric sensing       | AMP              | 12 ng/mL           | 0.05-100 µg/mL  | 10 min              | [1]        |
| Electro-optical platform              | AMP              | 0.5 µg/mL          | 0.5–600 µg/mL   | 10 min              | [2]        |
| Dual fluorescence –colorimetric       | AMP              | 2 ng/mL            | 5–100 ng/mL     | 1 h                 | [3]        |
| Fiber optic nanoplasmonic biosensor   | AMP              | 0.74 ng/mL         | /               | 15 min              | [4]        |
| SPICS                                 | HCG              | 0.30 mIU/mL        | 0.39-100 mIU/mL | 13 min              | This work  |
| Au@Polydopamine immunochromatographic | HCG              | 1.59 mIU/mL        | 2-10 mIU mL     | 25 min              | [5]        |
| plasmonic thermal sensing device      | HCG              | 2.8 mIU/mL         | 35-700 mIU/mL   | /                   | [6]        |
| Fluorescent immunochromatographic     | HCG              | 4.7 mIU/mL         | 10–5000 mIU/mL  | 15 min              | [7]        |
| Smartphone-lateral flow strip         | HCG              | 3 ng/mL            | 6–300 ng/mL     | /                   | [8]        |
| SPICS                                 | PSA              | 0.28 ng/mL         | 0.31-80 ng/mL   | 15 min              | This work  |
| Cellulose-binding protein LFIA        | PSA              | 0.25 ng/mL         | 0.25–2.5 ng/mL  | 20 min              | [9]        |
| Photoelectrochemical biosensor        | PSA              | /                  | 0.08-50 ng/mL   | >12 h               | [10]       |
| Bioluminescent immunoassay            | PSA              | 0.4 ng/mL          | 1-20 ng/ mL     | 15 min              | [11]       |
| Au–Se bonded nanoprobe                | PSA              | /                  | 1-40 ng/mL      | 50 min              | [12]       |

**Table S6.** Comparison of the performance between different grayscale scanning methods and smartphone immunochromatography methods.

| Detection technique                   | Total analysis time | Price (Analyzer included) | Operational complexity* | References                             |
|---------------------------------------|---------------------|---------------------------|-------------------------|----------------------------------------|
| SPICS                                 | 7/13/15 min         | Low                       | +                       | This work                              |
| Smartphone-Based                      |                     |                           |                         |                                        |
| Electrochemical lateral-flow device   | 12 min              | High                      | ++                      | [13]                                   |
| Polydopamine-Coated Gold lateral-flow | 30 min              | High                      | ++                      | [14]                                   |
| Cube™ quantitative reader             | 20 min              | High                      | +                       | [15]                                   |
| Fluorescent lateral flow platform     | 20 min              | High                      | +                       | [16]                                   |
| Cube Reader                           | 20 min              | High                      | +                       | NUMED                                  |
| Colloidal gold analyzer AGS1000       | 20 min              | High                      | ++                      | Guangzhou Lanbo Biotechnology Co., Ltd |
| YR-200 Portable Gold Mark Reader      | 20 min              | High                      | ++                      | Bioeasy Biotechnology, Inc.            |
| Immunoassay Analyzer CT3              | /                   | High                      | ++                      | Empirica Medical Company               |

\* +, simple; ++, relatively complex.

## References

- 1 W. Lu, Y. Guo, Y. Yue, J. Zhang, L. Fan, F. Li, Y. Zhao, C. Dong and S. Shuang, *Chem. Eng. J.*, 2023, 468, 143615.
- 2 O. I. Guliy, S. S. Evstigneeva and V. D. Bunin, *Talanta*, 225, 122007.
- 3 K. M. Song, E. Jeong, W. Jeon, M. Cho and C. Ban, *Anal Bioanal Chem.*, 2012, 402(6), 2153-2161.
- 4 P. P. Chaudhari, L. K. Chau, Y. T. Tseng, C. J. Huang and Y. L. Chen, *Mikrochim Acta.*, 2020, 187(7), 396.
- 5 G. Zhang, X. Lai, N. Ding, Q. Xiong, S. Hou, H. Duan and W. Lai, *Sens. Actuators, B*, 2021, 343, 130097.
- 6 Z. Qu, K. Wang, G. Alfranca, J. M. de la Fuente and D. Cui, *Nanoscale Res Lett.*, 2020, 15(1), 10.
- 7 Q. Zheng, H. Wu, H. Jiang, J. Yang and Y. Gao, *Sensors*, 2020, 20(16), 4521.
- 8 T. Zhang, H. Wang, Z. Zhong, C. Li, W. Chen, B. Liu and Y. Zhao, *Microchemical Journal*, 2020, 157, 105038.
- 9 J. M. Yang, K. R. Kim, S. Jeon, H. J. Cha and C. S. Kim, *Sens. Actuators, B*, 2021, 329, 129099.
- 10 M. Xu, L. Lin, G. Jin, Y. Lin and K. Zhang, *Biosens Bioelectron.*, 2022, 211, 114413.
- 11 M. E. Baghdadi, R. Emamzadeh, M. Nazari and E. Michelini, *Enzyme Microb Technol.*, 2024, 180, 110474.
- 12 Y. Chen, X. Guo, W. Liu and L. Zhang, *Mikrochim Acta.*, 2019, 186(2), 112.

- 13 W. Deenin, A. Yakoh, U. Pimpitak, E. Pasomsub, S. Rengpipat, G. A. Crespo and S. Chaiyo, *Bioelectrochemistry*, 2023, 152, 108438.
- 14 S. Xu, G. Zhang, B. Fang, Q. Xiong, H. Duan and W. Lai, *ACS Appl Mater Interfaces.*, 2019, 11(34), 31283-31290.
- 15 B. Srinivasan, D. M. Nanus, D. Erickson and S. Mehta, *Curr Res Biotechnol.*, 2021, 3, 288-299.
- 16 Z. Rong, R. Xiao, Y. Peng, A. Zhang, H. Wei, Q. Ma, D. Wang, Q. Wang, Z. Bai, F. Wang and M. Sun, *Sens. Actuators, B*, 2021, 329, 129193.
